# Supplementary material for: Highly resolved and refreshable X-ray imaging from Tb3+doped aluminosilicate oxyfluoride glass scintillators
Source: Royal Society of Chemistry journal article supplement (doi:10.1039/d2tc04576a), 2023-01-01
Supplement: d2tc04576a1.pdf [file d2tc04576a1.pdf]

Supporting Information for

## Highly resolved and refreshable X-ray imaging from Tb<sup>3+</sup> doped aluminosilicate oxyfluoride glass scintillators

SunYueZi Chen<sup>a,b,c</sup>, LianJie Li<sup>a</sup>, JunYu Chen<sup>a</sup>, ShuJun Xu<sup>a</sup>, WenJun Huang<sup>a</sup>,  
ZhuoXing Wen<sup>a</sup>, TingMing Jiang<sup>d\*</sup>, Hai Guo<sup>a\*</sup>

<sup>a</sup>Department of Physics, Zhejiang Normal University, Jinhua, Zhejiang, 321004, PR China

<sup>b</sup>Ningbo Institute of Materials Technology and Engineering, Chinese Academy of Sciences,  
Ningbo, Zhejiang, 315201, PR China

<sup>c</sup>University of Chinese Academy of Sciences, Beijing, 100049, PR China

<sup>d</sup>State Key Laboratory of Modern Optical Instrumentation, Zhejiang University, Hangzhou  
310027, PR China

---

**\*Corresponding author:**

TingMing Jiang, E-mail: [jiangtingming@zju.edu.cn](mailto:jiangtingming@zju.edu.cn);

Hai Guo, E-mail: [ghh@zjnu.cn](mailto:ghh@zjnu.cn)

Fig. S1(a) depicts the comparison of PL spectra of host glass and Tb<sup>3+</sup> doped glass specimens. Under 274 nm UV light excitation, G-host sample merely presents the distinguished emission at 313 nm (<sup>6</sup>P<sub>7/2</sub> to <sup>8</sup>S<sub>7/2</sub> transition of Gd<sup>3+</sup>). As the content of Tb<sup>3+</sup> raises, the emission at 313 nm declines. The emission peaks at 485, 542, 586 and 621 nm (<sup>5</sup>D<sub>4</sub> to <sup>7</sup>F<sub>6,5,4,3</sub> transitions of Tb<sup>3+</sup>) enhance first and descend afterward with increasing Tb<sup>3+</sup> content. Above phenomena prove the energy transfer from Gd<sup>3+</sup> to Tb<sup>3+</sup>.<sup>1-10</sup> The emission peaks at 379, 415 and 436 nm (<sup>5</sup>D<sub>3</sub> to <sup>7</sup>F<sub>6,5,4</sub> transitions of Tb<sup>3+</sup>) diminish gradually with boosting Tb<sup>3+</sup> content, which is owing to the cross relaxation (<sup>5</sup>D<sub>3</sub> + <sup>7</sup>F<sub>6</sub> → <sup>5</sup>D<sub>4</sub> + <sup>7</sup>F<sub>0</sub>) between Tb<sup>3+</sup> ions.

As shown in Fig. S1(b) and listed in Table 2, the lifetime of <sup>6</sup>P<sub>7/2</sub> of Gd<sup>3+</sup> (calculated from equation S1) is shortened gradually. Energy transfer efficiency  $\eta$  can be calculated by equation S2,<sup>11</sup>

$$\bar{\tau}_{\text{Gd}} = \int tI(t)dt / \int I(t)dt \quad (\text{S1})$$

$$\eta = 1 - \bar{\tau}_{\text{Gd}} / \tau_{\text{host}} \quad (\text{S2})$$

where  $\bar{\tau}_{\text{Gd}}$  is the average lifetime of <sup>6</sup>P<sub>7/2</sub> level of Gd<sup>3+</sup>,  $\tau_{\text{host}}$  is the average lifetime of <sup>6</sup>P<sub>7/2</sub> level of Gd<sup>3+</sup> in pure host (G-host specimen) without Tb<sup>3+</sup> doping. As displayed in Table 2, the energy transfer efficiency is enhanced with increasing Tb<sup>3+</sup> content, and the maximal energy transfer efficiency is 94.2%.

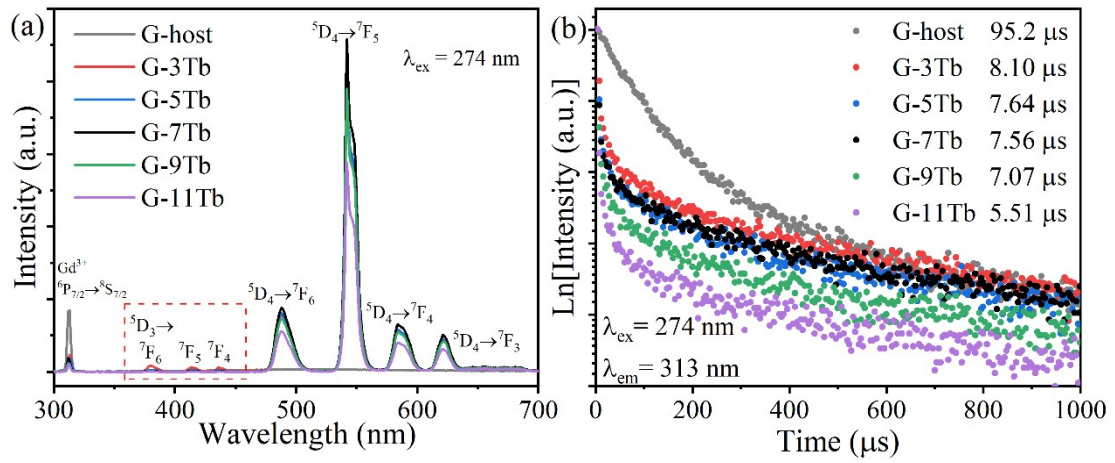

Fig. S1(a) Emission spectra of G-host and G-xTb specimens excited by 274 nm; (b) decay curves of emission at 313 nm of Gd<sup>3+</sup> in G-host and G-xTb specimens ( $\lambda_{\text{ex}} = 274$  nm).

Table S1 The density of all glass specimens.

| Specimen                     | G-host | G-3Tb | G-5Tb | G-7Tb | G-9Tb | G-11Tb |
|------------------------------|--------|-------|-------|-------|-------|--------|
| Density (g/cm <sup>3</sup> ) | 3.90   | 3.86  | 3.88  | 3.88  | 3.90  | 3.91   |

## Reference:

1. Y. Wu, D. Chen, Y. Li, L. Xu, S. Wang and S. Wu, *J. Lumin.*, 2022, **245**, 118762.
2. Z. Wen, L. Li, W. Huang, S. Chen, L. Lei, T. Pang and H. Guo, *J. Lumin.*, 2022, **250**, 119095.
3. L. Teng, W. Zhang, W. Chen, J. Cao, X. Sun and H. Guo, *Ceram. Int.*, 2020, **46**, 10718-10722.
4. X. Sun, X. Yu, W. Wang, Y. Li, Z. Zhang and J. Zhao, *J. Non-Cryst. Solids*, 2013, **379**, 127-130.
5. X. Sun, Q. Yang, P. Gao, H. Wu and P. Xie, *J. Lumin.*, 2015, **165**, 40-45.
6. C. Richard and B. Viana, *Light: Sci. Appl.*, 2022, **11**, 123.
7. J. Ma, W. Zhu, L. Lei, D. Deng, Y. Hua, Y. M. Yang, S. Xu and P. N. Prasad, *ACS Appl. Mater. Interfaces*, 2021, **13**, 44596-44603.
8. T. Han, X. Sun, X. Lai, J. Yu, L. Xia, H. Guo and X. Ye, *Radiat. Phys. Chem.*, 2021, **189**, 109734.
9. W. Chewpraditkul, Q. Sheng, D. Chen, A. Beitlerova and M. Nikl, *Phys. Status. Solidi. A*, 2012, **209**, 2578-2582.
10. W. Chen, J. Cao, F. Hu, R. Wei, L. Chen, X. Sun and H. Guo, *Opt. Mater. Express*, 2017, **8**, 41-49.
11. S. Chen, W. Zhang, L. Teng, J. Chen, X. Sun, H. Guo and X. Qiao, *J. Eur. Ceram. Soc.*, 2021, **41**, 6722-6728.
